# Supplementary material
Source: PubMed Central journal article supplement (PMC8936534)
Supplement: bmjstel-2021-000864supp001.pdf [file bmjstel-2021-000864supp001.pdf]

## Supplementary

Attached are the used questionnaires.

Questions not included in the original Evaluation of Technology Enhanced Learning Materials questionnaires<sup>1</sup> or Communication Assessment Tool<sup>2</sup> are as follows:

- Demographic questions (Age, Sex, Year) in the Student Feedback
  - Q22 and Q23 in the Instructor Feedback
  - Q16 in the Patient Feedback
- 
1. Cook, D. A. & Ellaway, R. H. Evaluating technology-enhanced learning: A comprehensive framework. *Med. Teach.* **37**, 961–970 (2015).
  2. Makoul, G., Krupat, E. & Chang, C.-H. Measuring patient views of physician communication skills: Development and testing of the Communication Assessment Tool. *Patient Educ. Couns.* **67**, 333–342 (2007).

## Student Feedback for Remote HoloLens Teaching

Age: \_\_\_\_ Sex: \_\_\_\_ Medical school year: \_\_\_\_

**Instructions** - Please indicate your agreement with each of the statements below. If you give any item a 1 (strongly disagree) or 7 (strongly agree) please be sure to comment on this at the end of the survey.

| <b>How well do you agree with the following?</b>                                                                                                                                   | <b>Strongly Disagree</b> | <b>Strongly Agree</b> |
|------------------------------------------------------------------------------------------------------------------------------------------------------------------------------------|--------------------------|-----------------------|
| 1. Instructions provided a good introduction to the session (e.g., how to get started, where to find various session components, how to obtain technical support if needed, etc.). | 1                        | 7                     |
| 2. Session objectives, expectations, and policies were clearly stated.                                                                                                             | 1                        | 7                     |
| 3. The session was well organized.                                                                                                                                                 | 1                        | 7                     |
| 4. Session objectives were relevant to my needs.                                                                                                                                   | 1                        | 7                     |
| 5. Navigation of the technology-based components of the session was logical, consistent, and efficient.                                                                            | 1                        | 7                     |
| 6. The session technologies and media supported the learning objectives.                                                                                                           | 1                        | 7                     |
| 7. This session required inappropriately high technology skills. (negative answer is better; if agree, please explain below)                                                       | 1                        | 7                     |
| 8. I had significant computer / technical problems during this session. (negative answer is better; if agree, please explain below)                                                | 1                        | 7                     |

| <b>How well do you agree with the following?</b>                                                                     | <b>Strongly Disagree</b> | <b>Strongly Agree</b> |
|----------------------------------------------------------------------------------------------------------------------|--------------------------|-----------------------|
| 9. The educational activities encouraged engagement with session materials / content.                                | 1                        | 2 3 4 5 6 7           |
| 10. The educational activities promoted achievement of the session objectives.                                       | 1                        | 2 3 4 5 6 7           |
| 11. There was a strong instructor presence / personal touch in the session.                                          | 1                        | 2 3 4 5 6 7           |
| 12. I had sufficient opportunity to assess and reflect upon my learning progress.                                    | 1                        | 2 3 4 5 6 7           |
| 13. I received adequate feedback on my learning progress.                                                            | 1                        | 2 3 4 5 6 7           |
| 14. I had sufficient opportunity to evaluate / provide feedback on the session.                                      | 1                        | 2 3 4 5 6 7           |
| 15. I received adequate support for any technical issues encountered during this session.                            | 1                        | 2 3 4 5 6 7           |
| 16. I received adequate support for any questions or concerns I had about my learning.                               | 1                        | 2 3 4 5 6 7           |
| 17. I encountered culture- or language-related problems. (negative answer is better; if agree, please explain below) | 1                        | 2 3 4 5 6 7           |
| 18. I invested enough time and energy to meet / exceed the session expectations.                                     | 1                        | 2 3 4 5 6 7           |
| 19. This session will change my practice.                                                                            | 1                        | 2 3 4 5 6 7           |



24. Is there anything else you'd like to share about your experience in this session? If so, please describe and explain.

Please write here:

**Thank you for your time.**

### Instructor Feedback for Remote HoloLens Teaching

*Instructions - Please indicate your agreement with each of the statements below. Answer questions using your judgment of participants' experiences, unless otherwise noted. If you give any item a 1 (strongly disagree) or 7 (strongly agree) please be sure to comment on this at the end of the survey.*

| <b>How well do you agree with the following?</b>                                                                                                                                                                                     | <b>Strongly Disagree</b> | <b>Strongly Agree</b> |
|--------------------------------------------------------------------------------------------------------------------------------------------------------------------------------------------------------------------------------------|--------------------------|-----------------------|
| 1. Instructions provided a good introduction to the session (e.g., participants did not have obvious questions about how to get started, where to find various session components, how to obtain technical support if needed, etc.). | 1                        | 2 3 4 5 6 7           |
| 2. Session objectives were relevant to participant needs.                                                                                                                                                                            | 1                        | 2 3 4 5 6 7           |
| 3. Navigation of the technology-based components of the session was logical, consistent, and efficient.                                                                                                                              | 1                        | 2 3 4 5 6 7           |
| 4. The session technologies and media supported the learning objectives.                                                                                                                                                             | 1                        | 2 3 4 5 6 7           |
| 5. This session required that participants possess inappropriately high computer skills. (negative answer is better; if agree, please explain below)                                                                                 | 1                        | 2 3 4 5 6 7           |

| <b>How well do you agree with the following?</b>                                                                                                             | <b>Strongly Disagree</b> | <b>Strongly Agree</b> |
|--------------------------------------------------------------------------------------------------------------------------------------------------------------|--------------------------|-----------------------|
| 6. The educational activities encouraged participants' engagement with session materials / content.                                                          | 1                        | 2 3 4 5 6 7           |
| 7. The educational activities promoted participants' achievement of the session objectives.                                                                  | 1                        | 2 3 4 5 6 7           |
| 8. I was able to contribute a personal presence / personal touch during the session's development and/or delivery.                                           | 1                        | 2 3 4 5 6 7           |
| 9. I plan to use learner feedback to improve the session.                                                                                                    | 1                        | 2 3 4 5 6 7           |
| 10. The session will be easy to maintain and deliver again.                                                                                                  | 1                        | 2 3 4 5 6 7           |
| 11. It will be easy to re-use of all or part of the session materials in other, future sessions.                                                             | 1                        | 2 3 4 5 6 7           |
| 12. I had access to needed tools during session development and delivery.                                                                                    | 1                        | 2 3 4 5 6 7           |
| 13. I had significant computer / technical problems while developing or delivering this session. (negative answer is better; if agree, please explain below) | 1                        | 2 3 4 5 6 7           |

**How well do you agree with the following?**

**Strongly Disagree**   **Strongly Agree**

14. I received adequate support for any technical issues encountered while developing and delivering this session.      1 2 3 4 5 6 7

15. I was able to provide adequate support to students for questions or concerns about their learning.      1 2 3 4 5 6 7

16. The session was a good use of time and resources.      1 2 3 4 5 6 7

17. The overall quality of this session was excellent.      1 2 3 4 5 6 7

*The most helpful part of feedback is specific suggestions to improve the session. Please take a few minutes to share your ideas.*

18. What could have been done to improve the process of session development and implementation?

Please write here:

19. How could the quality of the session be improved? What would you keep the same? What would you change, remove, or add? Please describe and explain.

Please write here:



20. Overall, what elements of this session most contributed to your excitement and engagement as an instructor? What could have been done to improve your engagement? Please describe and explain.

Please write here:

21. Is there anything else you'd like to share about your experience in this session? If so, please describe and explain.

Please write here:

22. Did the HoloLens make the consultation worse for you?

a. Yes No

If so, please describe and explain.

Please write here:

23. Did the HoloLens make the consultation better for you?

a. Yes No

If so, please describe and explain.

Please write here:

**Thank you for your time.**

### Patient Feedback (Communication Assessment Test)

Communication with patients is a very important part of quality medical care. We would like to know how you feel about the way your doctor communicated with you. Your answers are completely confidential, so please be as open and honest as you can. Thank you very much.

**Please use this scale to rate the way the doctor communicated with you.**

**Circle your answer for each item below.**

|      |      |      |           |           |
|------|------|------|-----------|-----------|
| 1    | 2    | 3    | 4         | 5         |
| poor | fair | good | very good | excellent |

| <u>The doctor</u>                                          | Poor | 1 | 2 | 3 | 4 | 5 | Excellent |
|------------------------------------------------------------|------|---|---|---|---|---|-----------|
| 1. Greeted me in a way that made me feel comfortable       | 1    | 2 | 3 | 4 | 5 |   |           |
| 2. Treated me with respect                                 | 1    | 2 | 3 | 4 | 5 |   |           |
| 3. Showed interest in my ideas about my health             | 1    | 2 | 3 | 4 | 5 |   |           |
| 4. Understood my main health concerns                      | 1    | 2 | 3 | 4 | 5 |   |           |
| 5. Paid attention to me (looked at me, listened carefully) | 1    | 2 | 3 | 4 | 5 |   |           |
| 6. Let me talk without interruptions                       | 1    | 2 | 3 | 4 | 5 |   |           |
| 7. Gave me as much information as I wanted                 | 1    | 2 | 3 | 4 | 5 |   |           |
| 8. Talked in terms I could understand                      | 1    | 2 | 3 | 4 | 5 |   |           |
| 9. Checked to be sure I understood everything              | 1    | 2 | 3 | 4 | 5 |   |           |

| <u>The doctor</u>                                      | Poor | Excellent |
|--------------------------------------------------------|------|-----------|
| 10.Encouraged me to ask questions                      | 1    | 2 3 4 5   |
| 11.Involved me in decisions as much as I wanted        | 1    | 2 3 4 5   |
| 12.Discussed next steps, including any follow-up plans | 1    | 2 3 4 5   |
| 13.Showed care and concern                             | 1    | 2 3 4 5   |
| 14.Spent the right amount of time with me              | 1    | 2 3 4 5   |
| <u>The doctor's staff</u>                              | Poor | Excellent |
| 15.Treated me with respect                             | 1    | 2 3 4 5   |

*The most helpful part of feedback is specific suggestions to improve the consultation. Please take a few minutes to share your ideas.*

**16.**Do you think the HoloLens changed the consultation in any way? If so, please describe and explain.

Please write here:

**Thank you for your time**
